# Supplementary material for: Phytochemical Diversity and Antioxidant Potential of Natural Populations of Nelumbo nucifera Gaertn. throughout the Floristic Regions in Thailand
Source: MDPI journal article supplement (doi:10.3390/molecules27030681), 2022-01-20
Supplement: s1 [file s1]

# Phytochemical Diversity and Antioxidant Potential of Natural Populations of *Nelumbo nucifera* Gaertn. throughout the Floristic Regions in Thailand

Duangjai Tungmunnithum <sup>1,2,3,\*</sup>, Samantha Drouet <sup>2</sup> and Christophe Hano <sup>2,3,\*</sup>

<sup>1</sup> Department of Pharmaceutical Botany, Faculty of Pharmacy, Mahidol University, Bangkok 10400, Thailand

<sup>2</sup> Laboratoire de Biologie des Ligneux et des Grandes Cultures, INRAE USC1328, Campus Eure et Loir, Orleans University, 28000 Chartres, France; samantha.drouet@univ-orleans.fr

<sup>3</sup> Le Studium Institut for Advanced Studies, 1 Rue Dupanloup, 45000 Orléans, France

\* Correspondence: duangjai.tun@mahidol.ac.th (D.T.); hano@univ-orleans.fr (C.H.)

**Table S1.** HPLC quantification of the main flavonoids in the stamen (A) and perianth (B) extracts of 18 *N. nucifera* populations originating from various floristic regions from Thailand.

| Sample | (1) Myr-3-O-Glc |      | (2) Rutin |      | (3) Quer-3-O-GlcA |      | (4) Kae-3-O-Rob |     | (5) Kae-3-O-Glc |      | (6) Kae-3-O-GlcA |      | (7) Iso-3-O-Glc |      |
|--------|-----------------|------|-----------|------|-------------------|------|-----------------|-----|-----------------|------|------------------|------|-----------------|------|
|        | mean            | SD   | mean      | SD   | mean              | SD   | mean            | SD  | mean            | SD   | mean             | SD   | mean            | SD   |
| S#1    | 115.6           | 6.0  | 48.6      | 6.9  | 118.1             | 17.6 | 22.9            | 1.2 | 52.6            | 2.9  | 136.5            | 7.6  | 127.4           | 18.5 |
| S#2    | 102.0           | 0.1  | 36.7      | 0.1  | 114.3             | 0.3  | 20.6            | 0.0 | 46.4            | 0.2  | 117.0            | 0.5  | 117.7           | 0.4  |
| S#3    | 103.0           | 1.5  | 37.0      | 1.5  | 105.2             | 4.4  | 24.8            | 0.4 | 46.8            | 3.2  | 108.1            | 6.1  | 110.8           | 4.5  |
| S#4    | 97.9            | 0.4  | 36.3      | 0.4  | 103.1             | 1.3  | 24.3            | 0.1 | 45.9            | 1.0  | 115.6            | 2.0  | 116.4           | 1.5  |
| S#5    | 91.5            | 2.6  | 30.9      | 2.4  | 93.5              | 7.7  | 22.1            | 0.6 | 41.6            | 5.6  | 104.9            | 11.7 | 105.6           | 8.4  |
| S#6    | 101.3           | 12.1 | 36.4      | 12.0 | 103.5             | 15.8 | 24.4            | 2.9 | 46.1            | 26.3 | 116.1            | 14.6 | 116.9           | 9.5  |
| S#7    | 108.0           | 0.2  | 41.8      | 0.2  | 110.4             | 0.5  | 26.0            | 0.0 | 49.1            | 0.4  | 123.8            | 0.8  | 124.6           | 0.6  |
| S#8    | 98.5            | 0.8  | 35.4      | 0.8  | 100.6             | 2.5  | 23.7            | 0.2 | 44.8            | 1.8  | 112.9            | 3.7  | 113.6           | 2.7  |
| S#9    | 104.0           | 2.9  | 37.4      | 2.9  | 106.3             | 8.7  | 25.1            | 0.7 | 47.3            | 6.4  | 119.3            | 13.3 | 120.0           | 9.6  |
| S#10   | 100.2           | 3.4  | 36.0      | 3.4  | 102.3             | 10.1 | 24.1            | 0.8 | 45.5            | 7.4  | 114.8            | 15.4 | 115.6           | 11.2 |
| S#11   | 100.0           | 10.5 | 36.0      | 10.4 | 102.2             | 10.9 | 24.1            | 2.5 | 45.5            | 2.3  | 114.6            | 17.1 | 115.4           | 4.1  |
| S#12   | 101.0           | 6.3  | 36.3      | 6.2  | 103.2             | 18.5 | 24.4            | 1.5 | 45.9            | 3.6  | 115.8            | 8.3  | 116.5           | 20.4 |
| S#13   | 102.6           | 2.6  | 36.9      | 2.6  | 104.9             | 7.8  | 24.7            | 0.6 | 46.7            | 5.7  | 117.7            | 11.9 | 118.4           | 8.6  |
| S#14   | 124.1           | 0.2  | 40.6      | 0.2  | 120.8             | 0.6  | 29.9            | 0.0 | 56.4            | 0.5  | 137.3            | 0.9  | 143.2           | 0.7  |
| S#15   | 123.5           | 1.0  | 44.4      | 1.0  | 112.2             | 2.7  | 27.8            | 0.2 | 56.1            | 2.3  | 140.5            | 4.7  | 142.5           | 3.4  |
| S#16   | 128.7           | 3.6  | 48.8      | 3.8  | 127.4             | 10.4 | 35.1            | 1.0 | 56.7            | 7.7  | 148.0            | 16.5 | 149.9           | 12.0 |
| S#17   | 124.5           | 3.5  | 34.8      | 2.7  | 127.2             | 10.4 | 30.0            | 0.8 | 56.6            | 7.6  | 132.7            | 14.8 | 140.6           | 11.2 |
| S#18   | 123.5           | 14.8 | 49.4      | 16.3 | 126.2             | 13.6 | 25.8            | 3.0 | 56.1            | 2.0  | 141.6            | 16.5 | 144.5           | 8.8  |
| P#1    | 14.1            | 1.9  | 18.2      | 4.9  | 13.1              | 3.9  | 21.0            | 2.1 | 42.0            | 1.9  | 55.4             | 0.7  | 22.7            | 6.4  |
| P#2    | 13.3            | 0.7  | 21.3      | 4.2  | 16.2              | 3.3  | 25.2            | 1.8 | 41.4            | 4.0  | 53.9             | 5.0  | 22.9            | 4.6  |
| P#3    | 5.0             | 0.5  | 12.6      | 3.4  | 5.7               | 1.6  | 16.9            | 1.6 | 23.0            | 0.6  | 24.1             | 3.0  | 16.9            | 4.6  |
| P#4    | 11.8            | 1.0  | 16.9      | 4.0  | 8.4               | 2.1  | 24.4            | 2.0 | 32.0            | 4.1  | 45.8             | 4.9  | 19.4            | 4.3  |
| P#5    | 10.9            | 1.0  | 16.4      | 3.8  | 12.3              | 3.0  | 22.6            | 1.9 | 36.7            | 4.6  | 45.1             | 4.9  | 16.9            | 4.0  |
| P#6    | 7.3             | 0.3  | 10.0      | 1.8  | 9.0               | 1.7  | 14.4            | 0.9 | 22.9            | 7.5  | 27.1             | 2.5  | 12.4            | 2.3  |
| P#7    | 7.8             | 0.6  | 13.0      | 2.8  | 9.7               | 2.2  | 15.5            | 1.2 | 29.0            | 1.3  | 32.5             | 3.3  | 13.3            | 3.3  |
| P#8    | 9.3             | 0.6  | 18.4      | 3.4  | 11.5              | 2.2  | 19.4            | 1.3 | 34.5            | 1.0  | 35.6             | 3.1  | 15.8            | 3.0  |
| P#9    | 7.2             | 0.5  | 11.9      | 2.1  | 8.9               | 1.6  | 12.2            | 0.8 | 22.7            | 2.9  | 24.9             | 2.1  | 10.3            | 1.8  |
| P#10   | 6.2             | 0.5  | 12.2      | 2.5  | 7.6               | 1.6  | 14.2            | 1.0 | 22.9            | 4.0  | 27.6             | 2.7  | 10.5            | 2.2  |
| P#11   | 5.6             | 0.5  | 10.3      | 2.4  | 7.0               | 1.7  | 11.1            | 0.9 | 21.8            | 8.6  | 23.3             | 2.5  | 7.6             | 1.8  |
| P#12   | 6.6             | 0.4  | 10.9      | 1.9  | 9.1               | 1.6  | 13.0            | 0.8 | 24.3            | 7.2  | 27.2             | 2.2  | 11.2            | 2.0  |
| P#13   | 6.5             | 0.5  | 10.8      | 2.1  | 8.0               | 1.7  | 14.9            | 1.0 | 24.1            | 8.2  | 27.0             | 2.5  | 11.1            | 2.2  |
| P#14   | 11.1            | 0.4  | 18.4      | 3.2  | 13.7              | 1.7  | 21.9            | 3.7 | 41.1            | 4.8  | 45.0             | 2.2  | 18.9            | 2.1  |
| P#15   | 9.9             | 0.1  | 16.4      | 1.4  | 12.2              | 0.3  | 19.5            | 1.2 | 35.5            | 2.8  | 40.9             | 0.7  | 15.8            | 0.2  |
| P#16   | 13.9            | 1.5  | 22.0      | 2.8  | 17.2              | 2.5  | 27.5            | 3.0 | 51.5            | 6.3  | 55.6             | 2.0  | 23.7            | 3.0  |
| P#17   | 13.1            | 0.5  | 21.7      | 1.0  | 16.2              | 0.8  | 27.8            | 1.1 | 46.4            | 2.1  | 54.2             | 0.7  | 22.3            | 1.0  |
| P#18   | 15.1            | 1.1  | 26.2      | 5.3  | 18.8              | 4.0  | 30.0            | 2.2 | 56.2            | 9.8  | 64.9             | 2.9  | 25.8            | 5.4  |

Myr-3-O-Glc: myricetin-3-O-glucose; Quer-3-O-GlcA: quercetin-3-O-glucuronic acid; Kae-3-O-Rob: kaempferol-3-O-robinobiose; Kae-3-O-Glc: kaempferol-3-O-glucose; Kae 3-O-GlcA: kaempferol 3-O-glucuronic acid; Iso-3-O-Glc: isorhamnetin-3-O-glucose. Means and standard deviations of 3 independent analysis.

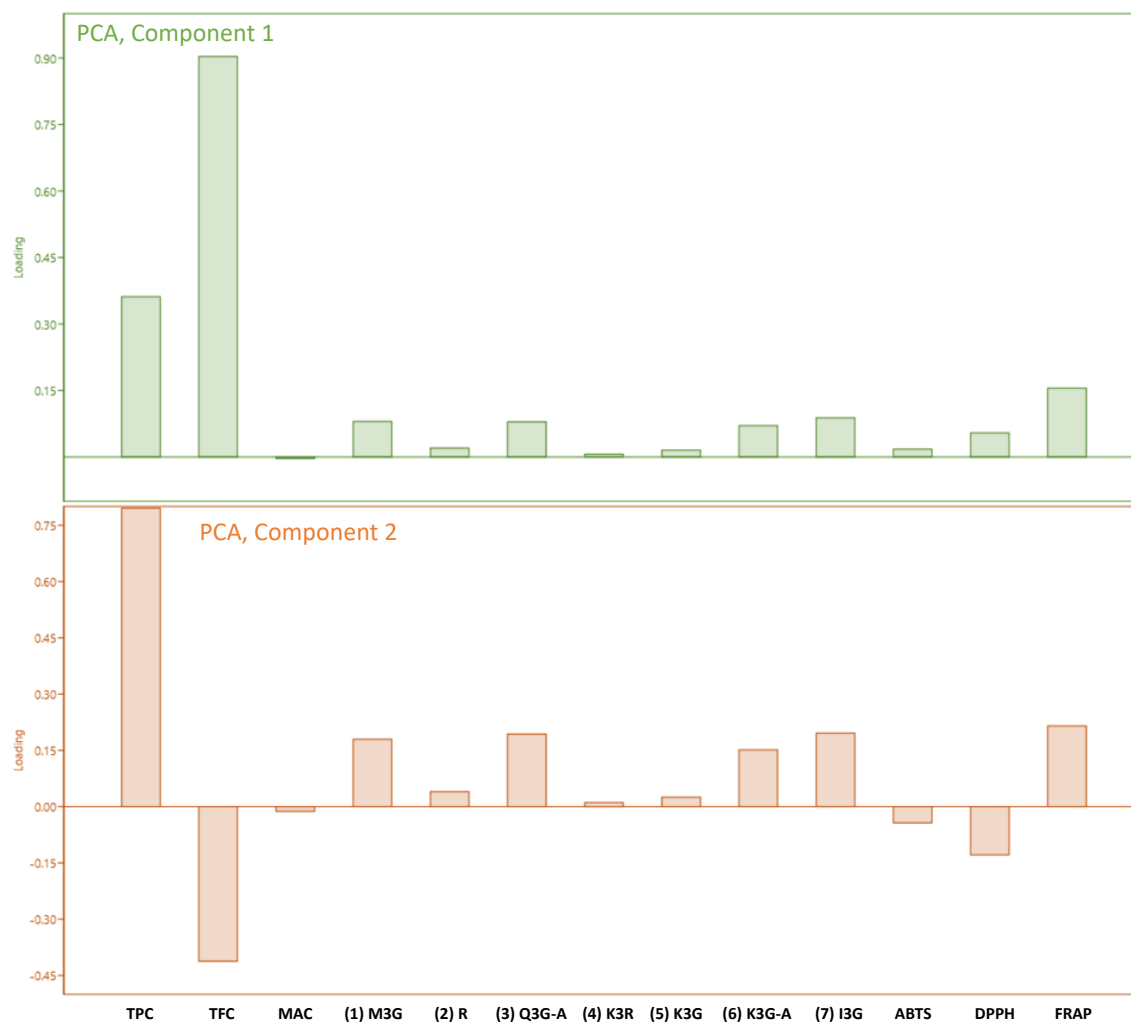

**Figure S1.** Loading scores of the component 1 and component 2 of the PCA (presented in Figure 5) linking the phytochemical profile and antioxidant capacity of the stamen and perianth extracts of 18 *N. nucifera* populations originating from various floristic regions from Thailand.
